# Supplementary material for: Efficient degradation of organic pollutants without any external assistance over a wide pH range using carbon vacancy-modified Fe–N–C catalysts
Source: Royal Society of Chemistry journal article supplement (doi:10.1039/d4nr03755c), 2024-01-01
Supplement: d4nr03755c1.pdf [file d4nr03755c1.pdf]

**Efficient degradation of organic pollutants without any external assistance in wide pH range using carbon vacancy-modified Fe–N–C catalyst**

Feng Li, Kairen Zhao, Yan Jin and Baoxin Li\*

Key Laboratory of Applied Surface and Colloid Chemistry, Ministry of Education; Key Laboratory of Analytical Chemistry for Life Science of Shaanxi Province, School of Chemistry & Chemical Engineering, Shaanxi Normal University, Xi'an 710062, China

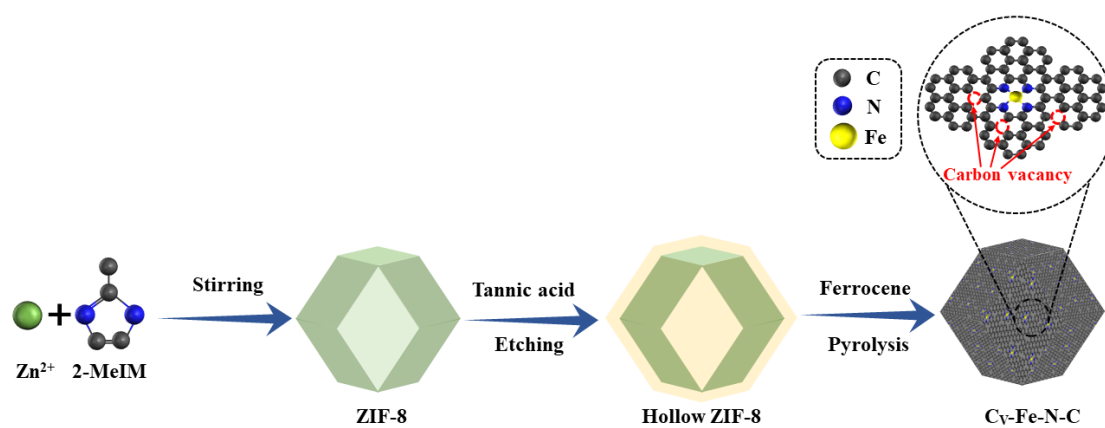

**Figure S1.** Schematic illustration of the synthesis process of Cv-Fe-N-C SACs.

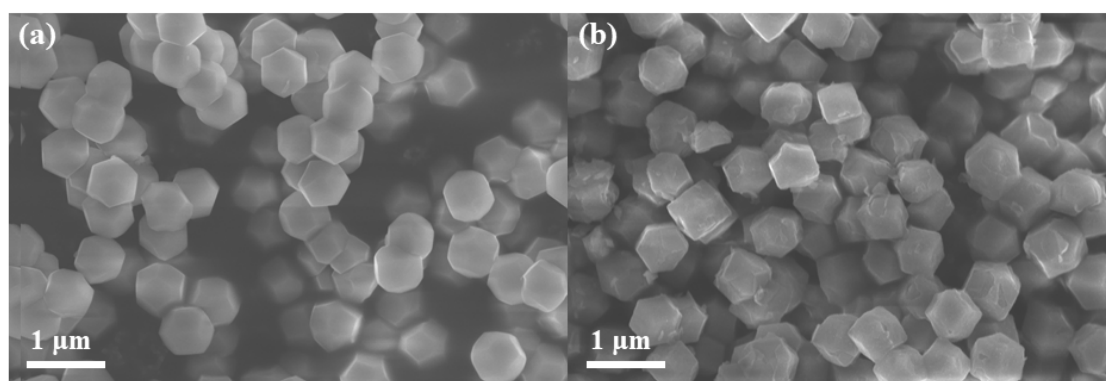

**Figure S2.** SEM images of ZIF-8 (a) and hollow ZIF-8 (b).

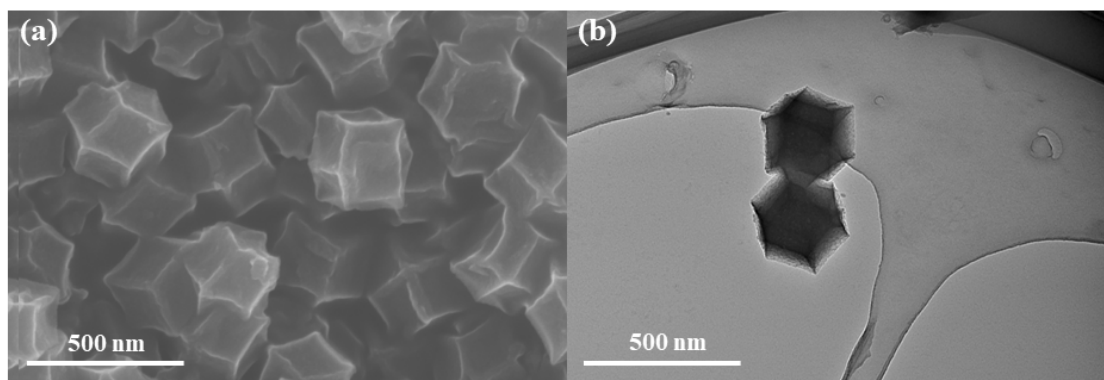

**Figure S3.** (a) SEM images of Fe-N-C and (b) TEM images of Fe-N-C.

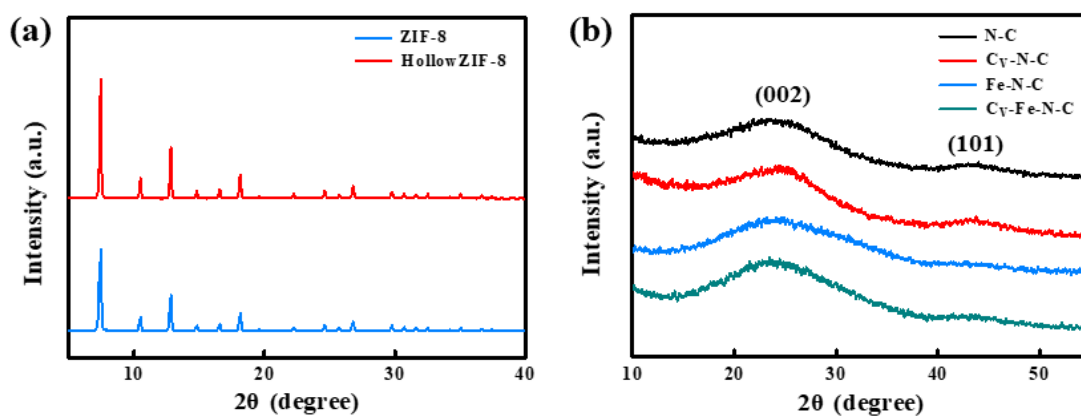

**Figure S4.** (a) XRD patterns of ZIF-8 and hollow ZIF-8, and (b) XRD patterns of N-C, C<sub>v</sub>-N-C, Fe-N-C and C<sub>v</sub>-Fe-N-C.

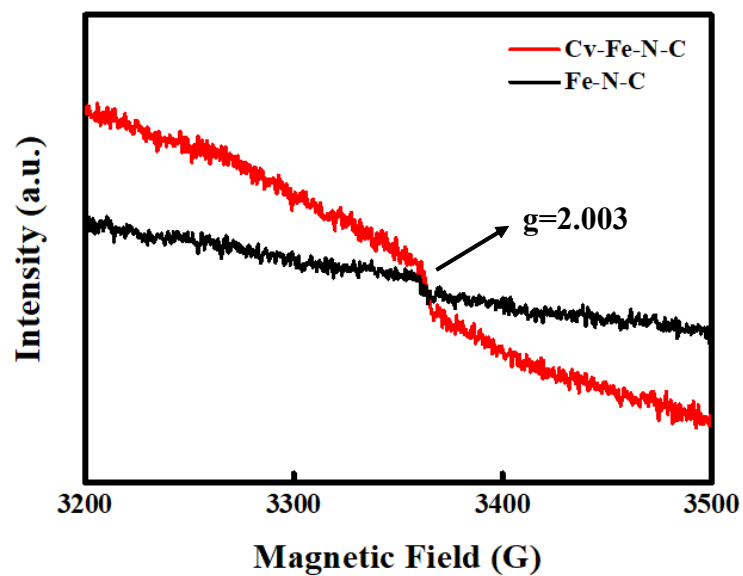

**Figure S5.** The EPR spectra of Cv-Fe-N-C and Fe-N-C

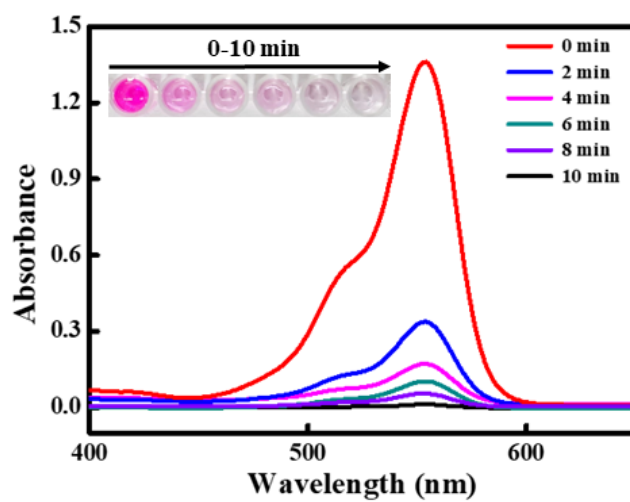

**Figure S6.** The UV-vis absorbance spectra of RhB solution in the presence of Cv-Fe-N-C at different reaction time. Experimental conditions:  $[C_v\text{-Fe-N-C}] = 0.2 \text{ g/L}$ ,  $[\text{RhB}]_0 = 10 \text{ mg/L}$ , and  $T = 298 \text{ K}$ .

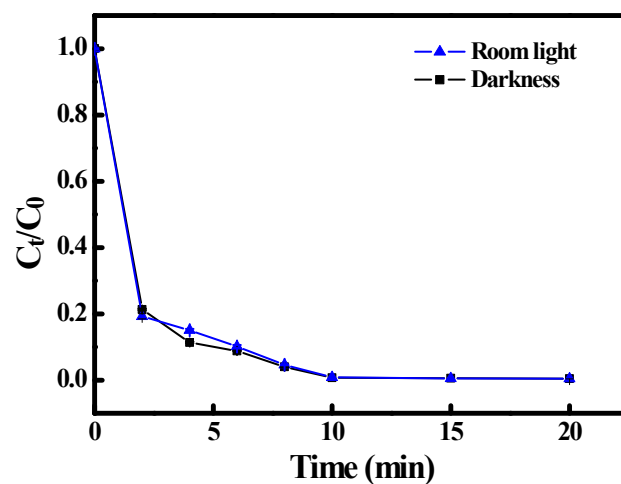

**Figure S7.** Degradation effects of RhB under room light or darkness. Experimental conditions:  $[C_V\text{-Fe-N-C}] = 0.2 \text{ g/L}$ ,  $[\text{RhB}]_0 = 10 \text{ mg/L}$ , and  $T = 298 \text{ K}$ .

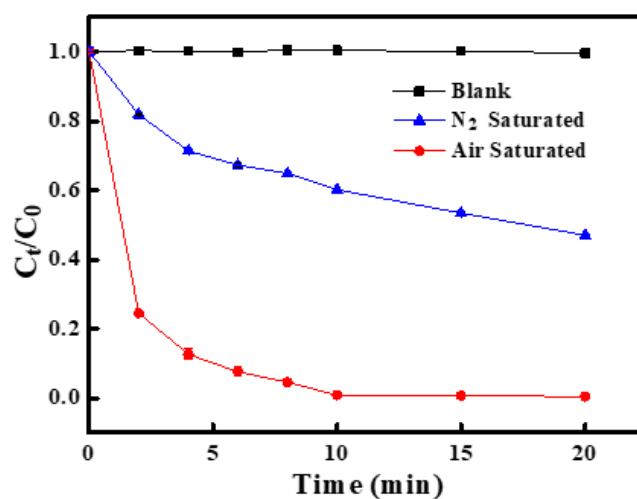

**Figure S8.** Degradation of RhB with  $C_V\text{-Fe-N-C}$  under  $\text{N}_2$  or air saturated solution. Experimental conditions:  $[C_V\text{-Fe-N-C}] = 0.2 \text{ g/L}$ ,  $[\text{RhB}]_0 = 10 \text{ mg/L}$ , and  $T = 298 \text{ K}$ .

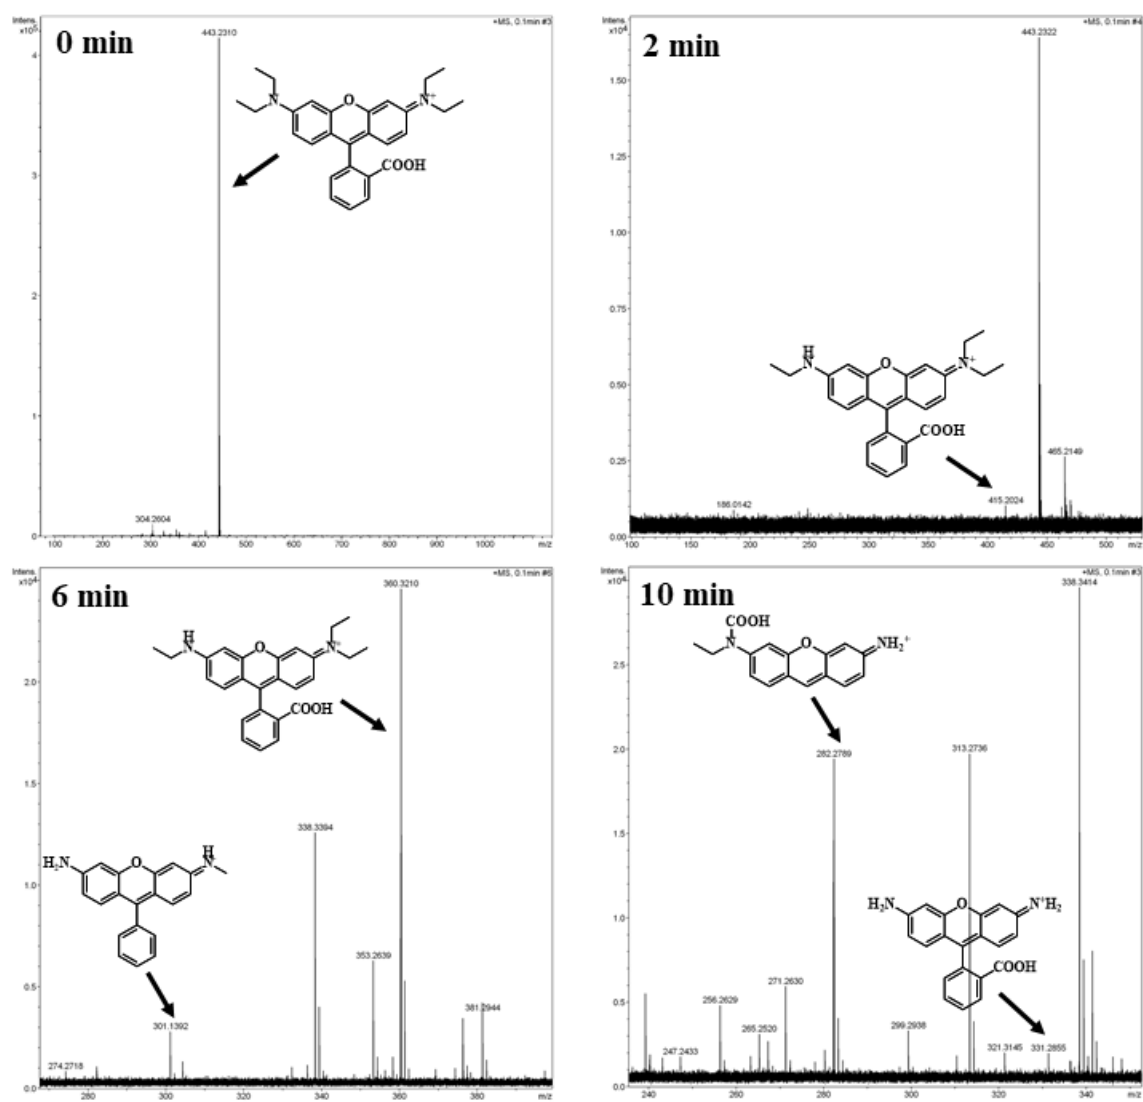

**Figure S9.** Mass spectra of the main degradation products of RhB with C<sub>V</sub>-Fe-N-C at the degradation time of 0, 2, 6, and 10 min.

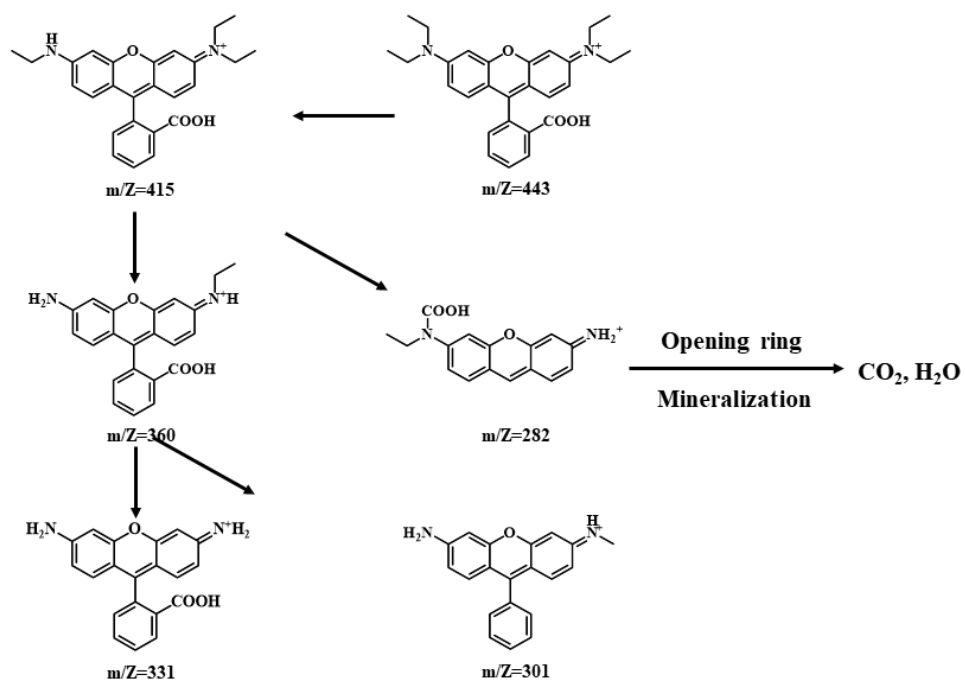

**Figure S10.** The possible degradation pathway of RhB with C<sub>V</sub>-Fe-N-C.

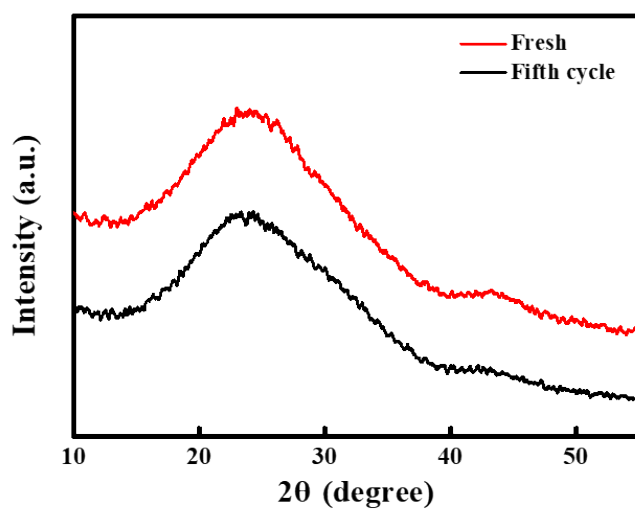

**Figure S11.** XRD pattern of C<sub>V</sub>-Fe-N-C SACs before and after fifth cycle use.

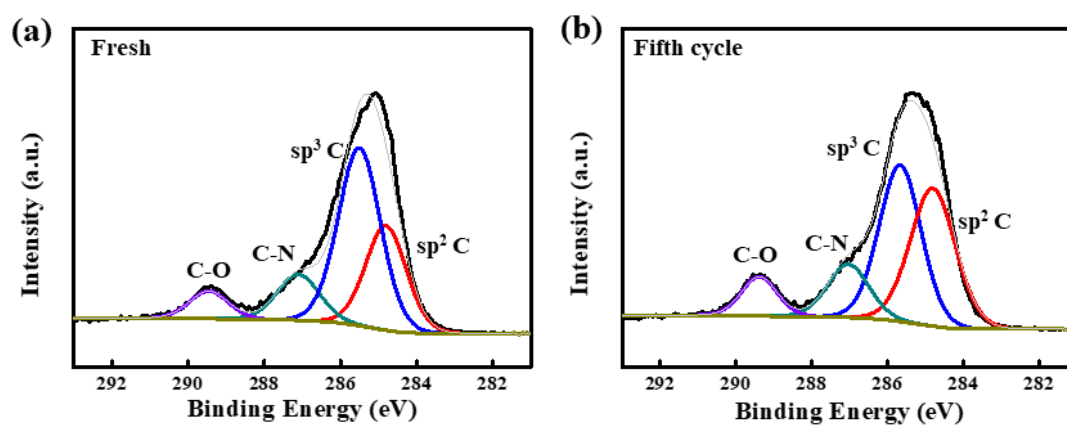

**Figure S12.** XPS C 1s spectra of C<sub>v</sub>-Fe-N-C SACs before and after fifth cycle use.
